# Supplementary material
Source: publisher site journal article supplement (https://www.dovepress.com/article/348278)
Supplement: Supplementary file 1 [file get_supplementary_file.php]

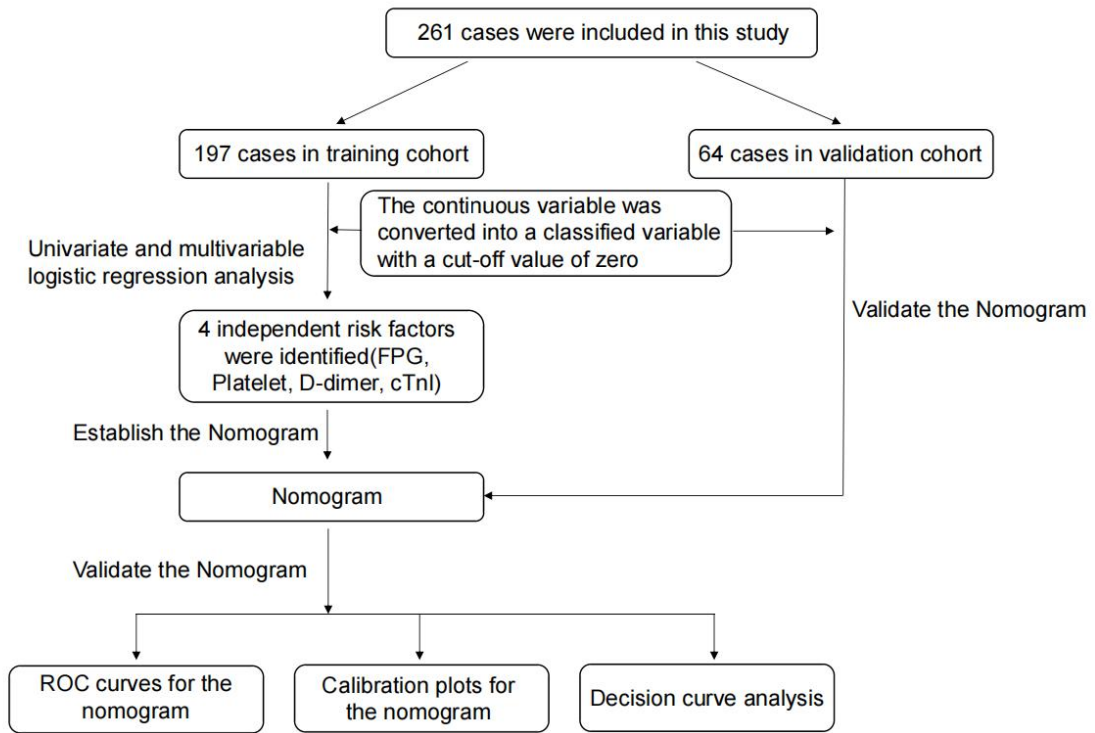

**Figure S1** Flowchart of the data processing workflow.

**Table S1** Area under the ROC curve and optimal cutoff value of variables of CARDS

| Variables                                | AUC   | 95%CI       | Cutoff value |
|------------------------------------------|-------|-------------|--------------|
| Age                                      | 0.695 | 0.611-0.779 | 64.5         |
| FPG, mmol/L                              | 0.639 | 0.55-0.727  | 5.14         |
| CRP, mg/L                                | 0.771 | 0.693-0.85  | 22           |
| White blood cell count, $\times 10^9$ /L | 0.591 | 0.491-0.691 | 7.37         |
| Lymphocyte count, $\times 10^9$ /L       | 0.713 | 0.614-0.812 | 0.87         |
| Platelet count, $\times 10^9$ /L         | 0.669 | 0.569-0.769 | 190          |
| ALT, U/L                                 | 0.614 | 0.516-0.769 | 35.5         |
| AST, U/L                                 | 0.694 | 0.595-0.792 | 42           |
| Albumin, g/L                             | 0.666 | 0.574-0.759 | 33.85        |
| Scr, $\mu$ mol/L                         | 0.719 | 0.622-0.815 | 5.25         |
| BUN, mmol/L                              | 0.583 | 0.481-0.686 | 82.5         |
| D-dimer, $\mu$ g/mL                      | 0.824 | 0.756-0.893 | 1.66         |
| cTnl, pg/ml                              | 0.91  | 0.862-0.959 | 15.8         |
| IL-6, pg/ml                              | 0.766 | 0.684-0.848 | 10.19        |

**Abbreviations:** ROC,receiver operating characteristic; AUC, area under the curve

**Table S2** Rating form of Nomogram

| FPG, mmol/L | points | Platelet count, $\times 10^9$ /L | points | D-dimer, $\mu$ g/mL | points | cTnl, pg/ml | points |
|-------------|--------|----------------------------------|--------|---------------------|--------|-------------|--------|
| <5.14       | 0      | <190                             | 43.59  | <1.66               | 0      | <15.8       | 0      |
| $\geq$ 5.14 | 67.69  | $\geq$ 190                       | 0      | $\geq$ 1.66         | 55.79  | $\geq$ 15.8 | 100    |

**Table S3** Multiple cross-validation

| Method                         | Accuracy | Kappa values |
|--------------------------------|----------|--------------|
| Hold-Out Method                | 0.95     | 0.83         |
| Leave-One-Out Cross Validation | 0.9      | 0.66         |
| 10-fold Cross Validation       | 0.9      | 0.63         |
